# Supplementary material for: The consequences of a high-calorie diet background before calorie restriction on skeletal muscles in a mouse model
Source: publisher site journal article supplement (doi:10.18632/aging.203237), 2021-06-24
Supplement: Supplementary file [file aging-v13i12-203237-supplementary-material-SD3.pdf]

**Supplementary Table 3. List of primers.**

| Oligo name      | Sequence forward (5' to 3') | Sequence reverse (5' to 3') | Product size (bp) | Accession number <sup>a</sup> |
|-----------------|-----------------------------|-----------------------------|-------------------|-------------------------------|
| 18s rRNA        | GTAACCCTTTGAACCCATT         | CCATCCAATCGGTAGTAGCG        |                   |                               |
| Adiponectin     | AAGGACAAGGCCGTTCTCT         | TATGGGTAGTTGCAGTCAGTTGG     | 219               | NM_009605.5                   |
| Adipo R1        | TTCTTCCTCATGGCTGTGATGT      | AAGAAGCGCTCAGGAATTCG        | 71                | XM_021197931.2                |
| AdipoR2         | TGCAGCCATTATAGTCTCCAG       | GAATGATTCCACTCAGGCCTAG      | 101               | XM_021190928.2                |
| AMPK $\alpha$ 1 | GTCGACGTAGCTCCAAGACC        | ATCGTTTTCCAGTCCCTGTG        | 232               | XM_011245321.3                |
| AMPK $\alpha$ 1 | CGCCTCTAGTCTCCATCAG         | ATGTCACACGCTTTGCTCTG        | 219               | XM_029539581.1                |
| AMPK $\beta$ 2  | GTTGCTGTTGCTTGTCCAA         | ATACTGTGCCTGCCTCTGCT        | 149               | XM_021163526.2                |
| AMPK $\beta$ 2  | ACCCAAGCACAGCTCTAGACACAA    | AGGGTAGTTTCCTTGCTCACACAT    | 119               | XM_006500841.2                |
| AMPK $\gamma$ 1 | TCCCTAGACCTCACCACACC        | GTCTGCACAGCACAGAACC         | 191               | XM_021183007.2                |
| AMPK $\gamma$ 1 | ATTGACCCTATCAGTGGGAACGCA    | TCCGATTCCAAGCTCATCCAGGTT    | 132               | XM_030254045.1                |
| ATP5C1          | CATGGACAACGCCAGCAAGA        | TTTACCTCTGTCTGAGGATGCAAC    | 165               | NM_001112738.1                |
| CD34            | GTTATTTCTCTGATGAACCGTCG     | CTCCACCATTCTCCGTGTAATA      | 84                | XM_021198209.1                |
| eNOS            | AAGATTGCCTCGGTTTGTG         | AAGATTGCCTCGGTTTGTG         | 89                | XM_006535639.4                |
| Fabp4           | ATGATCATCAGCGTAAATGG        | GCCTTTCATAACACATTCCA        | 246               | XM_021157748.2                |
| GAPDH           | AGGTCGGTGTGAACGGATTG        | GGGGTCGTTGATGGCAACA         | 95                | XM_017321385.2                |
| IGF-1           | TGGATGCTCTCAGTTCGTG         | GTCTTGGGCATGTCAGTGTG        | 220               | XM_030244912.2                |
| IGF-1R          | GTGGGGGCTCGTGTTC            | GATCACCGTGCAGTTTCCA         | 127               | XM_006540643.5                |
| mTOR            | TTCAATCCATAGCCCCGTCT        | CAAAGAGCTGCATCACTCGT        | 150               | XM_006539077.3                |
| Myf5            | CTGTCTGGTCCCAGAAAGAAC       | AAGCAATCCAAGCTGGACAC        | 103               | XM_006513319.2                |
| MyoD            | CCCCGGCGGCAGAATGGCTACG      | GGTCTGGGTTCCCTGTTCTGTGT     | 234               | NM_010866.2                   |
| NDUFS3          | GCTTCGAGGGACATCCTTTC        | AGTTACTTGGTTTCAGGCTTCT      | 223               | XM_021152446.2                |
| PAX3            | TCGGAGGAGTATTATCAACGG       | CAATTTCTTCTCCACGTCAGG       | 231               | XM_021156775.1                |
| PAX7            | GTCATGAGCATCCTTAGCAAC       | CCATACTGGCTGTAAGTGGTAG      | 242               | XM_021160851.1                |
| PAX9            | GAAACACATCCGACTTACAAG       | GCTGCTTGTATGAGTCGTAATG      | 185               | XM_021179351.1                |
| Perilipin       | CTGTGTGCAATGCCTATGAGA       | CTGGAGGGTATTGAAGAGCCG       | 171               | XM_011250776.3                |
| PGC1- $\alpha$  | TATGGAGTGACATAGAGTGTGCT     | CCACTTCAATCCACCCAGAAAG      | 134               | XM_036164894.1                |
| T-cadherin      | CATCGAAGCTCAAGATATGG        | GATTTCATTGATGATGGTG         | 230               | XM_021169677.2                |
| TIMM9           | AATATGGCTGCACAGATACC        | TTCAGGTTTCACCTCTCTTG        | 135               | XM_017315088.2                |
| TOMM20          | GAAACAGAAGCTTGCTAAGGAG      | GTCACCTTGTGCTAGTAACTCT      | 127               | XM_021170680.2                |
| TOMM40          | TGAACAGTAACTGGATCGTG        | GGAGGACATCAAGTCTTCC         | 390               | XM_030242769.1                |
