# Supplementary material for: The consequences of a high-calorie diet background before calorie restriction on skeletal muscles in a mouse model
Source: Aging (Albany NY). 2021 Jun 24;13(12):16834–58. doi: 10.18632/aging.203237 (PMC8266348; doi:10.18632/aging.203237)
Supplement: Supplementary Table 4 [file aging-13-203237-s004.xlsx]

## Sheet: Sheet1
Supplementary Table 4. Satellite markers and other genes expression.
									Pectoralis major (PM)								Quadriceps femoris vastus medialis (QF-VM)
	Reference	Label	Organism	Expressed	SD		SD-CR		HC		HC-SD		SD		SD-CR		HC		HC-CR
	gene			as:	AVG	STDEV	AVG	STDEV	AVG	STDEV	AVG	STDEV	AVG	STDEV	AVG	STDEV	AVG	STDEV	AVG	STDEV
Fabp4	GAPDH			%	0	14	-34	12	197	29	248	40	0	5	91.5	16	172	25	300	33
Perilipin	GAPDH			%	0	46	-168	62	1100	138	328	45	0	22	7	24	548	67	422	61
PAX3				%	0	26	4	25	-27	37	33	26	0	20	52	14	-3	10	-60	21
PAX7				%	0	28	97	26	-22	18	176	27	0	23	119	25	-1	26	48	13
PAX9				%	0	25	89	20	-24	32	-29	10	0	10	77	17	-71	13	21	4
CD34				%	0	28	20	18	126	15	56	12	0	21	78	18	87	20	29	12
MyoD				%	0	12	20	20	-10	22	220	24	0	15	79	19	6	16	70	8
Myf5				%	0	24	-24	25	19	20	121	12	0	14	106	20	49	22	62	13
eNOS	18S-rRNA	SYBR Green	Mus (Taxid: 10088)	%	0	6	-15	5	-97	17	71	10	0	5	-4	6	-49	7	12	6
TOMM20				%	0	11	-58	9	209	17	217	22	0	8	39	9	96	15	60	13
TOMM40				%	0	14	-56	17	40	10	97	22	0	9	8	7	14	10	39	12
TIMM9				%	0	9	-23	6	137	20	151	23	0	11	38	12	52	17	59	15
NDUFS3				%	0	7	-68	15	48	13	22	5	0	8	19	8	47	12	32	6
ATP5C1				%	0	9	-27	8	219	38	52	15	0	12	69	17	155	24	180	29
AMPKa1				%	0	10	-37.5	14	750	39	320	45	0	18	-19.5	21	239	38	160	26
AMPKa2				%	0	11	-49	14	748	35	261	29	0	13	-57	16	189	29	66	27
AMPKb1				%	0	10	-115	16	259	26	53	12	0	16	-44	20	114	23	92	27
AMPKb2				%	0	17	-38	12	636	76	334	52	0	12	-40	15	207	50	105	41
AMPKg1				%	0	15	-106	21	410	37	215	17	0	20	-56	15	293	66	102	39
AMPKg2				%	0	16	3	32	472	71	352	57	0	16	26	32	369	71	260	57
mTOR				%	0	23	-62	16	-67	13	-103	22	0	10	13	12	10	18	-34	8
Adiponectin				Fold	0 fold	0.11	-2.23	0.3	2.07	0.29	1.315	0.16	0 fold	0.18	0.805	0.28	2.26	0.29	3.11	0.35
AdipoR1				Fold	0 fold	0.11	-0.43	0.1	0.99	0.13	1.09	0.16	0 fold	0.12	0.045	0.11	0.385	0.05	0.3	0.04
T-cadherin				Fold	0 fold	0.12	-0.31	0.08	0.65	0.17	1.35	0.11	0 fold	0.11	0.02	0.08	0.31	0.12	0.43	0.13
Description: Gene expression between groups are expressed as percentage (%) or fold values. For each gene expressed as % or fold, the 3.1CG value was set to 0, and the compared samples were normalized to this level.
Positive values represent upregulation. Negative values represent downregulation. The transcript levels were normalized to those of the endogenous control 18s rRNA or GAPDH.
